# Supplementary material for: Psychometric properties of patient reported outcome measures in idiopathic pulmonary fibrosis
Source: PubMed Central journal article supplement — Chron Respir Dis. 2021 Oct 5;18:14799731211033925. doi: 10.1177/14799731211033925 (PMC8495510; doi:10.1177/14799731211033925), 2021-10-05
Supplement: sj-pdf-1-crd-10.1177_14799731211033925.pdf [file sj-pdf-1-crd-10.1177_14799731211033925.pdf]

## APPENDIX

### Patient Global Impression of Change (PGIC) questionnaire

Since your last clinic visit, has there been any change in overall quality of life (satisfaction or happiness with life) related to your lung condition idiopathic pulmonary fibrosis, IPF?

Please place a cross in the appropriate box.

- A very great deal worse
- A great deal worse
- A good deal worse
- Moderately worse
- Somewhat worse
- A little worse
- Almost the same, hardly any worse at all
- No change
- Almost the same, hardly any better
- A little better
- Somewhat better
- Moderately better
- A good deal better
- A great deal better
- A very great deal better
